# Supplementary material for: A novel three-dimensional Fe3SnC/C hybrid nanofiber absorber for lightweight and highly-efficient microwave absorption
Source: Royal Society of Chemistry journal article supplement (doi:10.1039/d0cp04594b), 2020-01-01
Supplement: d0cp04594b1.pdf [file d0cp04594b1.pdf]

## Supporting Information

### **A novel three-dimensional Fe<sub>3</sub>SnC/C hybrid nanofiber absorber for lightweight and highly-efficient microwave absorption**

Guangguang Guan,<sup>‡ a</sup> Guojun Gao,<sup>‡ a</sup> Jun Xiang <sup>\*a</sup>, Jingnan Yang <sup>a</sup>, Xiaoqiang Li <sup>a</sup>,  
Kaiyin Zhang <sup>\*b</sup>

<sup>a</sup> School of Science, Jiangsu University of Science and Technology, Zhenjiang 212003, China

<sup>b</sup> College of mechanical and electrical engineering, Wuyi University, Wuyishan 354300, China.

Corresponding Authors

\*E-mail address: jxiang@just.edu.cn (J. Xiang).

\*E-mail address: ky Zhang\_eyou@163.com (K. Zhang).

#### **Experimental Section**

Preparation of materials: 3D Fe<sub>3</sub>SnC/C HNFs were fabricated through electrospinning method followed by stabilization in air and carbonization in Ar. In a typical process, 2.3451 g of Fe(NO<sub>3</sub>)<sub>3</sub>·9H<sub>2</sub>O and 0.6549 g of SnCl<sub>2</sub>·2H<sub>2</sub>O were dissolved together in a DMF solution of 2 g of polyvinylpyrrolidone (PVP, Mw≈1300000, Aldrich). The obtained solution was then transferred to a syringe for electrospinning using a TL-01 electrospinning apparatus at an operating voltage of 18 kV, a spinning distance of 15 cm and a feeding rate of 0.5 mL/h. Finally, the collected precursor fibers after drying overnight at 80 °C were calcined at 250 °C for 2 h in air and subsequently carbonized at 700 °C for 3 h under Ar atmosphere to yield Fe<sub>3</sub>SnC/C HNFs. For comparison, pure carbon NFs were also obtained in the similar route without Fe(NO<sub>3</sub>)<sub>3</sub>·9H<sub>2</sub>O and SnCl<sub>2</sub>·2H<sub>2</sub>O.

Characterization: The phase composition, morphology and microstructure of the sample were characterized by using X-ray diffractometer (XRD, Bruker D8 advance), field-emission scanning electron microscopy (FE-SEM, ZEISS Merlin Compact), and transmission electron microscopy (TEM, JEOL JEM-2100), respectively. Thermogravimetric analysis (TGA) was conducted on a TGA apparatus (Shimadzu, DTG-60H) in air. The room temperature magnetic properties were investigated using a HH-20 vibration sample magnetometer (VSM) with an applied external field of 1.5 T. EM parameters of the paraffin-based toroidal composite filled with 20 wt% Fe<sub>3</sub>SnC/C HNFs were performed on an Agilent PNA N5224A vector network analyzer over 2–18 GHz using the

coaxial-line method. The composite was pressed into toroidal-shaped sample before test ( $\Phi_{out} = 7.00$  mm,  $\Phi_{in} = 3.04$  mm).

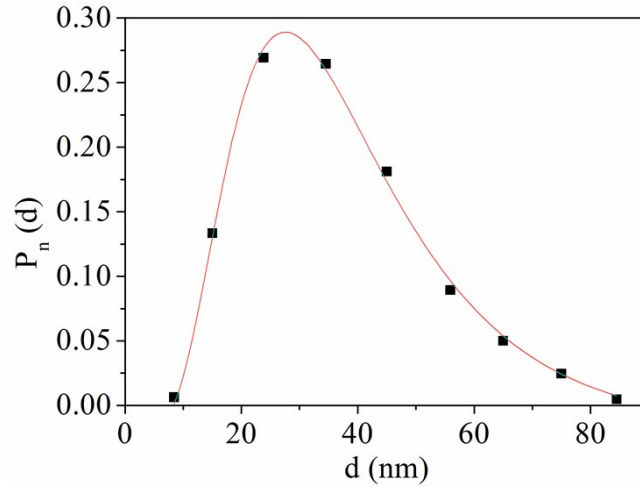

**Figure S1.** Number average particle size distribution of Fe<sub>3</sub>SnC particles.

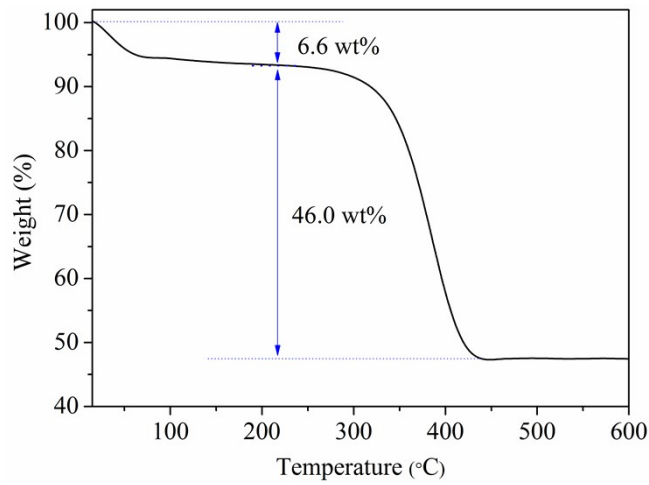

**Figure S2.** TG curve of Fe<sub>3</sub>SnC/C HNFs.

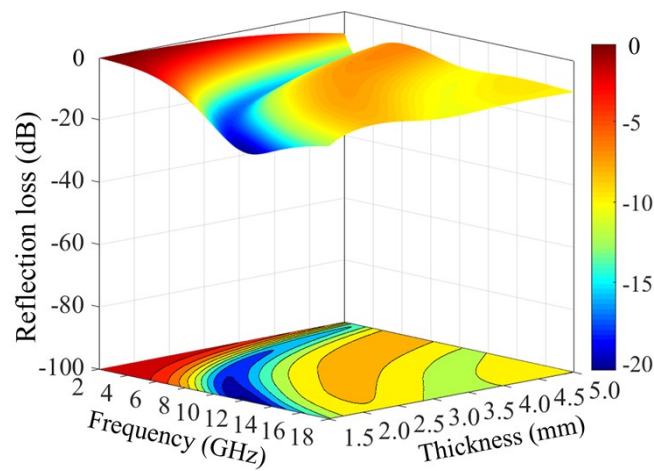

**Figure S3.** 3D representation of RL for CNFs.

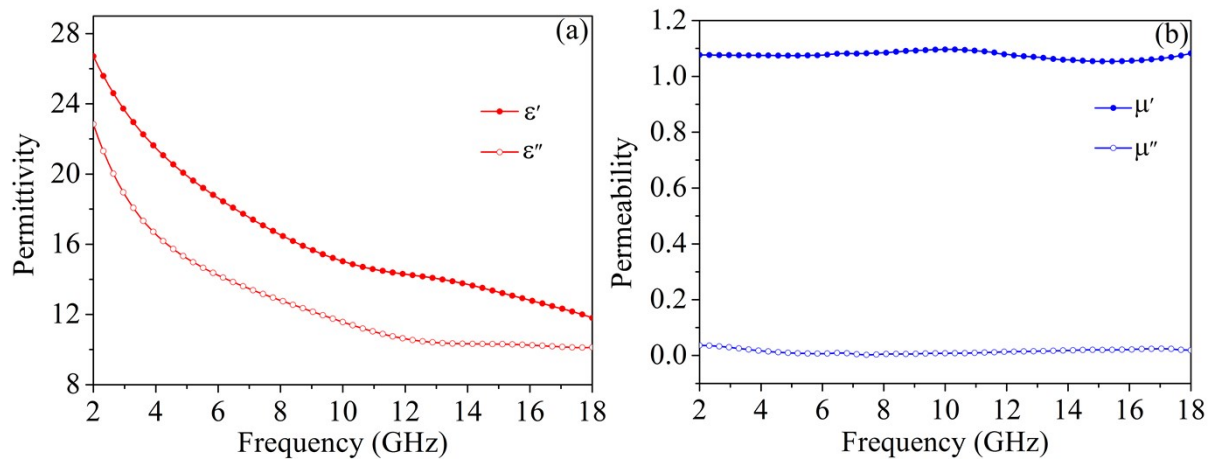

**Figure S4.** (a) Relative complex permittivity and (b) complex permeability of CNFs.

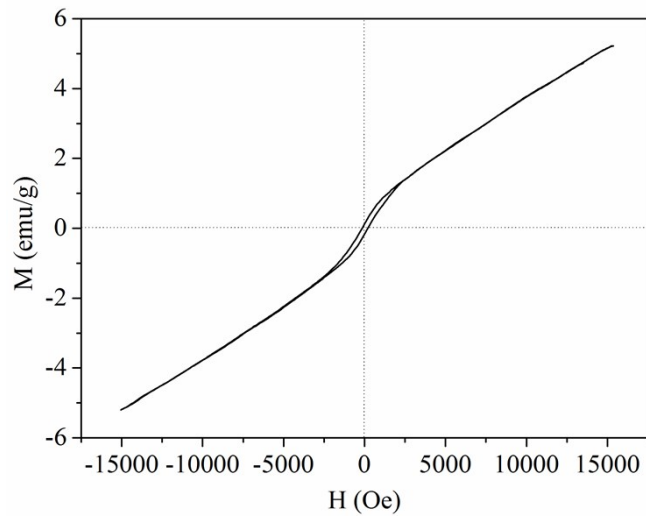

**Figure S5.** Room-temperature hysteresis loop of Fe<sub>3</sub>SnC/C HNFs.
